# Supplementary material for: A fluorescent quaternary phosphonium main-chain-type polymer: an opportunity to fabricate functional materials with excellent antibacterial activity and bacterial imaging capability
Source: Royal Society of Chemistry journal article supplement (doi:10.1039/d3tb01240a), 2023-01-01
Supplement: d3tb01240a1.pdf [file d3tb01240a1.pdf]

## Supporting information

# A Fluorescent Quaternary Phosphonium Main-Chain Type Polymer: An Opportunity to Fabricate Functional Materials with Excellent Antibacterial Activity and Bacterial Imaging Capability

Jiawei Lv,<sup>a</sup> Saicuo Wang,<sup>b</sup> Chunxuan Qi,<sup>c</sup> Muheman Li,<sup>a</sup> Yuqing Sun,<sup>a</sup> Yuan Yang,<sup>a</sup>  
Cheng Zeng,<sup>a</sup> Richao Shen,<sup>a</sup> Hengchang Ma\*<sup>a</sup>

<sup>a</sup> Key Laboratory of Polymer Materials of Gansu Province, Key Laboratory of Eco-  
Environment-Related Polymer Materials Ministry of Education, College of Chemistry  
and Chemical Engineering, Northwest Normal University. Lanzhou 730070, P.R.  
China.

<sup>b</sup> China Agricultural Vet. Bio. Science and Technology Co., Ltd., Lanzhou 730046,  
P.R. China.

<sup>c</sup> AIE Research Center, Shaanxi Key Laboratory of Phytochemistry, College of  
Chemistry and Chemical Engineering, Baoji University of Arts and Sciences, Baoji  
721013, P.R. China.

## Table of Contents

|                                                                                      |    |
|--------------------------------------------------------------------------------------|----|
| 1. $^1\text{H}$ and $^{13}\text{C}$ NMR Spectra of Compounds.....                    | 3  |
| 2. $^{31}\text{P}$ NMR Spectra of Compounds .....                                    | 15 |
| 3. UV- <i>vis</i> and PL Spectra of Compounds .....                                  | 18 |
| 4. FT-IR spectrum of Compounds .....                                                 | 24 |
| 5. AIE test of two polymers .....                                                    | 25 |
| 6. Wettability test .....                                                            | 26 |
| 7. SEM images.....                                                                   | 27 |
| 8. EDS images.....                                                                   | 28 |
| 9. Antibacterial activity test .....                                                 | 29 |
| 10. Bacterial imaging .....                                                          | 30 |
| 11. MIC data and the chemical structures of representative antibacterial agents..... | 32 |
| 12. Density functional theory (DFT) calculations.....                                | 34 |
| 13. Cytotoxicity Cell imaging .....                                                  | 35 |
| 14. Cell imaging .....                                                               | 36 |

## 1. $^1\text{H}$ and $^{13}\text{C}$ NMR Spectra of Compounds.

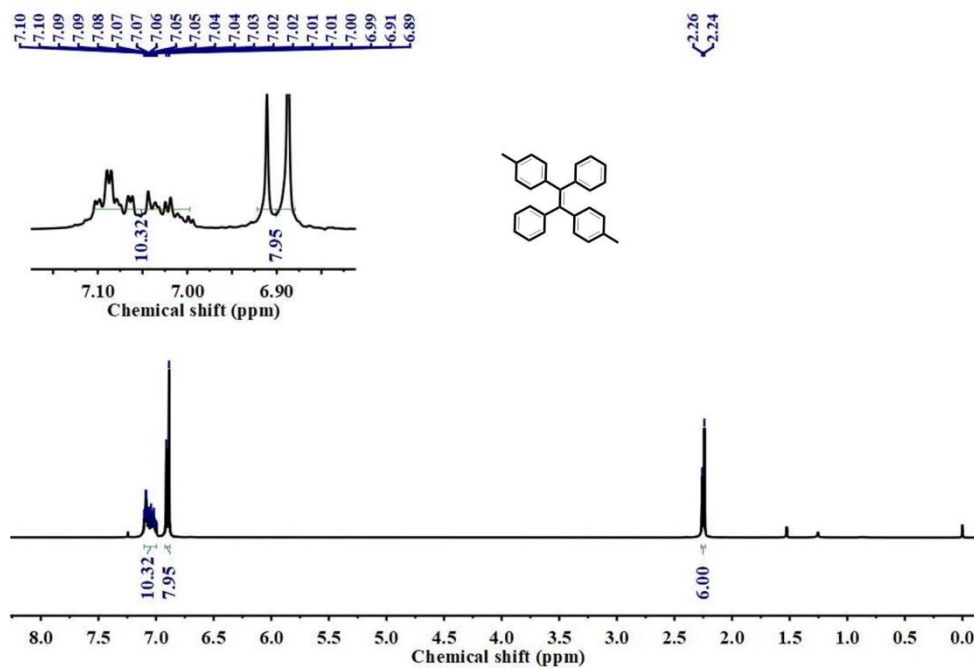

**Figure S1.**  $^1\text{H}$  NMR spectrum of TPE-2CH<sub>3</sub> measured in CDCl<sub>3</sub> at room temperature.

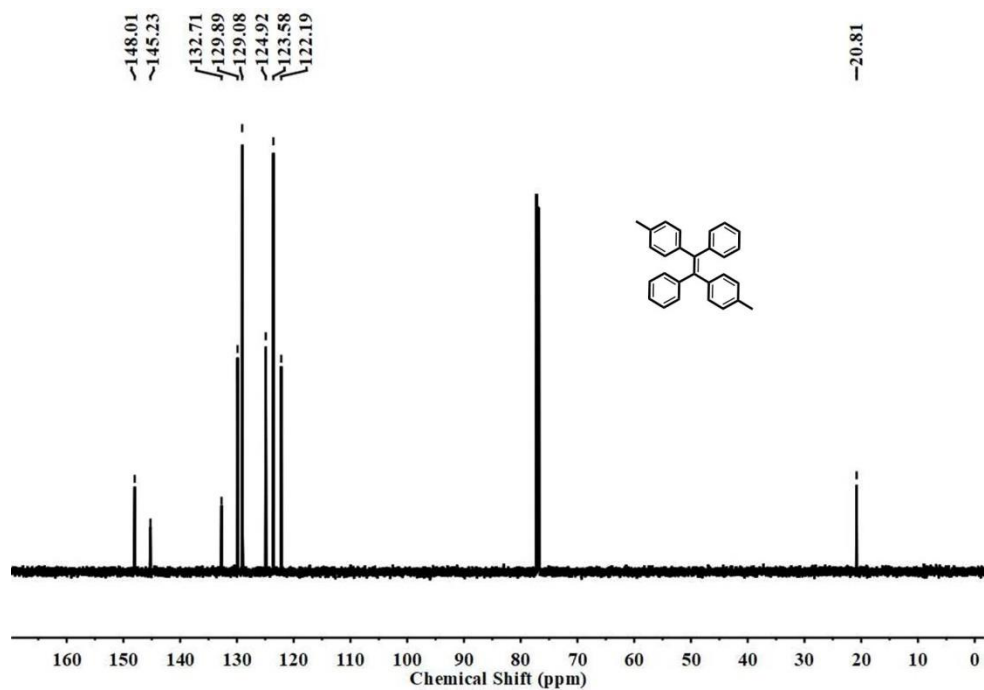

**Figure S2.**  $^{13}\text{C}$  NMR spectrum of TPE-2CH<sub>3</sub> measured in CDCl<sub>3</sub> at room temperature.

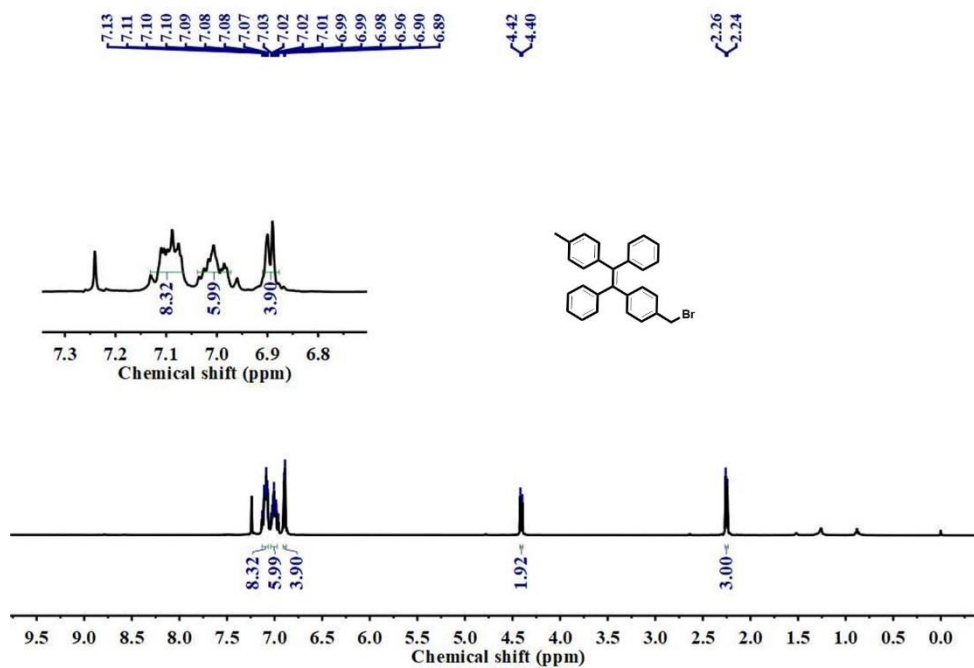

**Figure S3.**  $^1\text{H}$  NMR spectrum of TPE- $\text{CH}_2\text{-Br}$  measured in  $\text{CDCl}_3$  at room temperature.

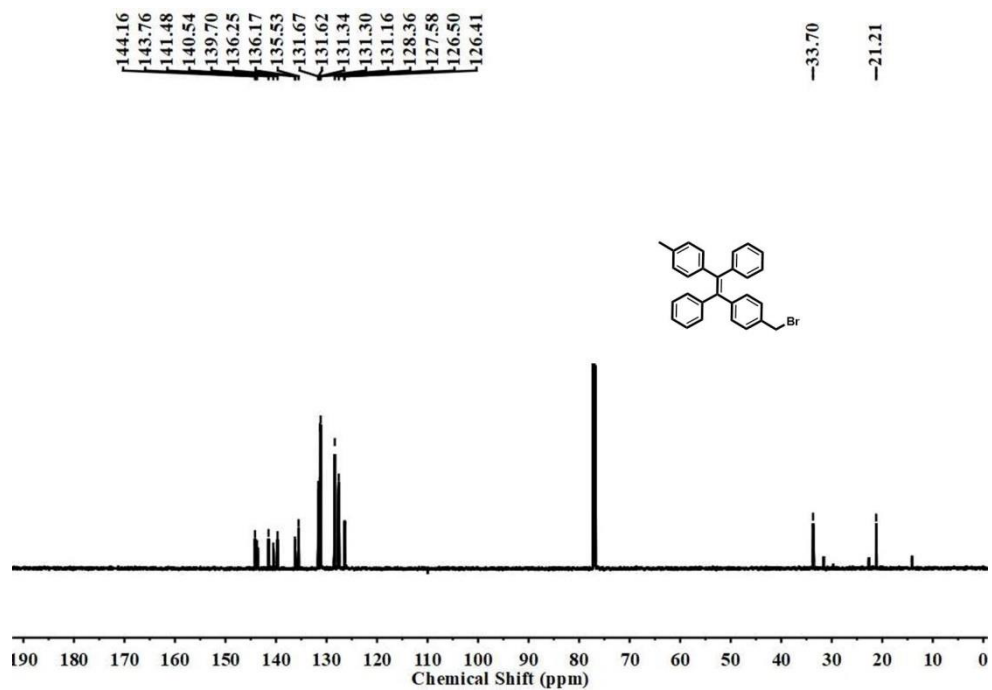

**Figure S4.** <sup>13</sup>C NMR spectrum of TPE-CH<sub>2</sub>-Br measured in CDCl<sub>3</sub> at room temperature.

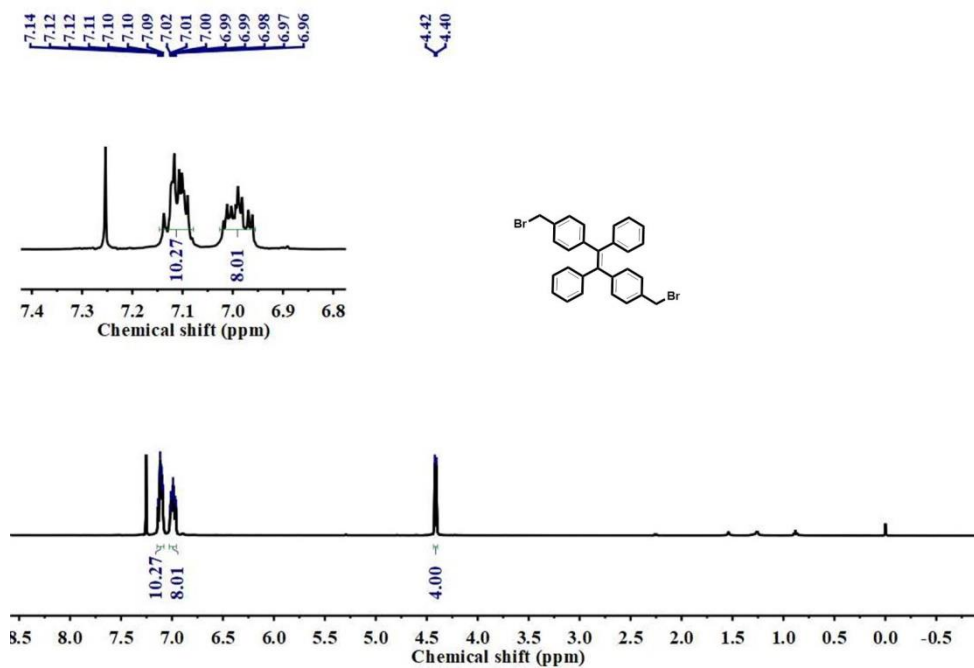

**Figure S5.**  $^1\text{H}$  NMR spectrum of TPE-2CH<sub>2</sub>Br measured in CDCl<sub>3</sub> at room temperature.

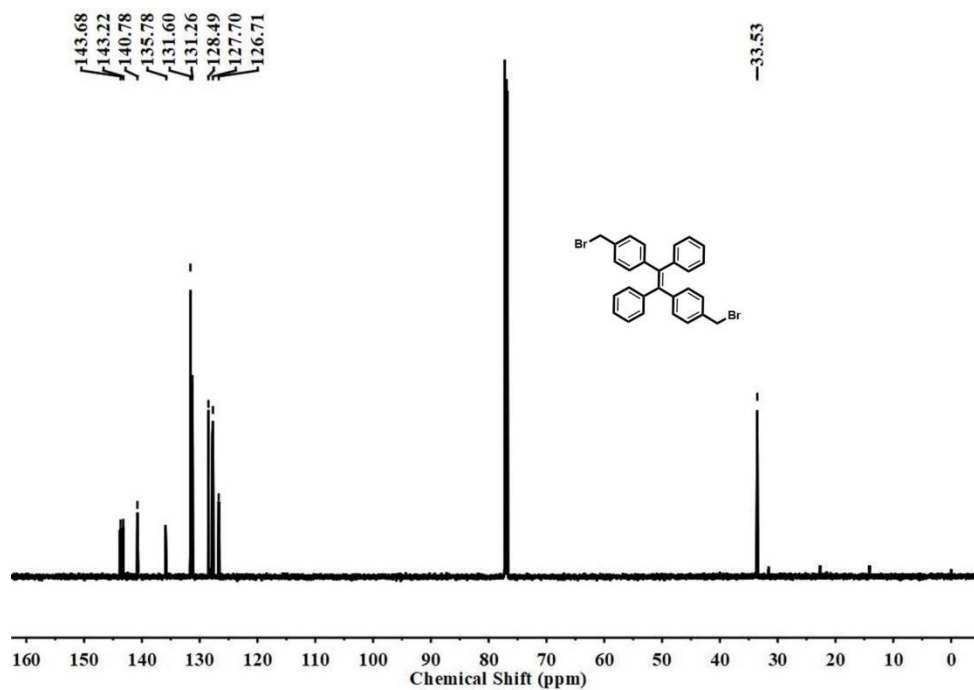

**Figure S6.**  $^{13}\text{C}$  NMR spectrum of TPE-2CH<sub>2</sub>Br measured in CDCl<sub>3</sub> at room temperature.



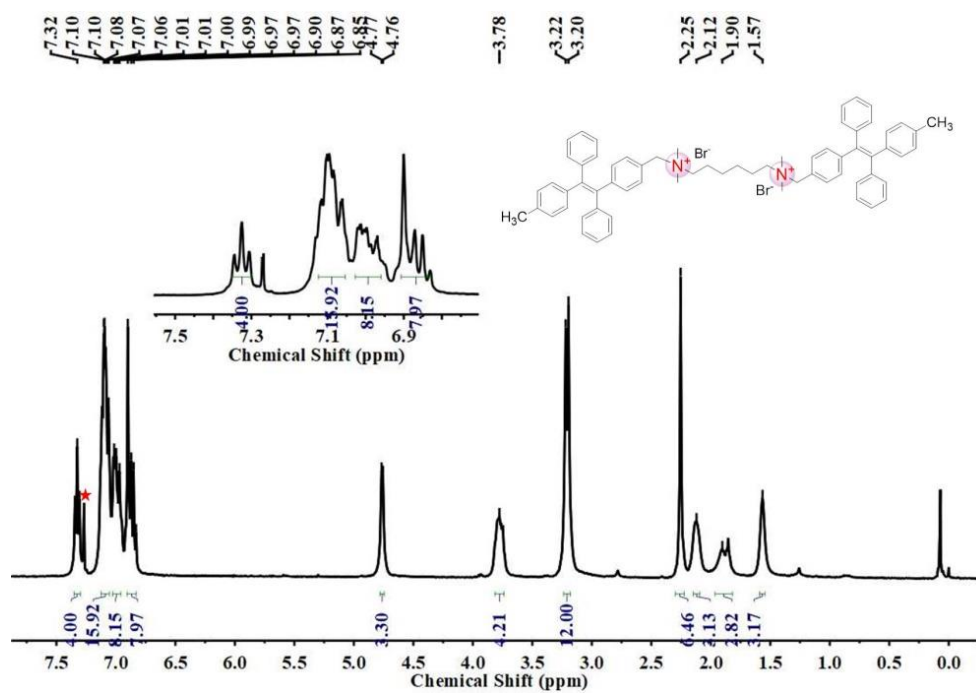

**Figure S7.**  $^1\text{H}$  NMR spectrum of TPE-2N $^+$  measured in  $\text{CDCl}_3$  at room temperature.

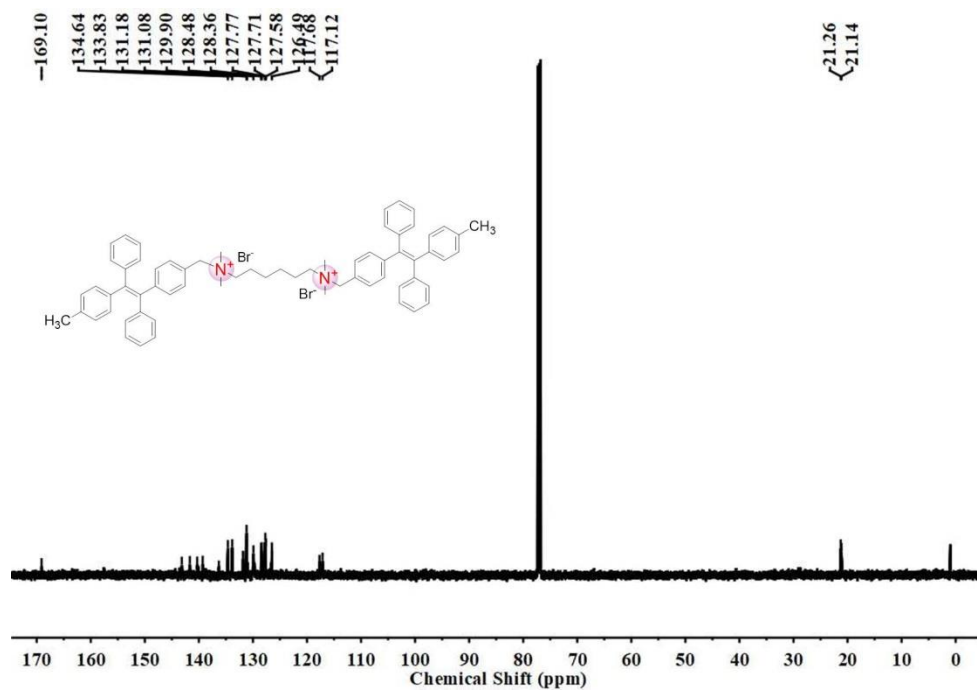

**Figure S8.**  $^{13}\text{C}$  NMR spectrum of TPE-2N $^+$  measured in  $\text{CDCl}_3$  at room temperature.

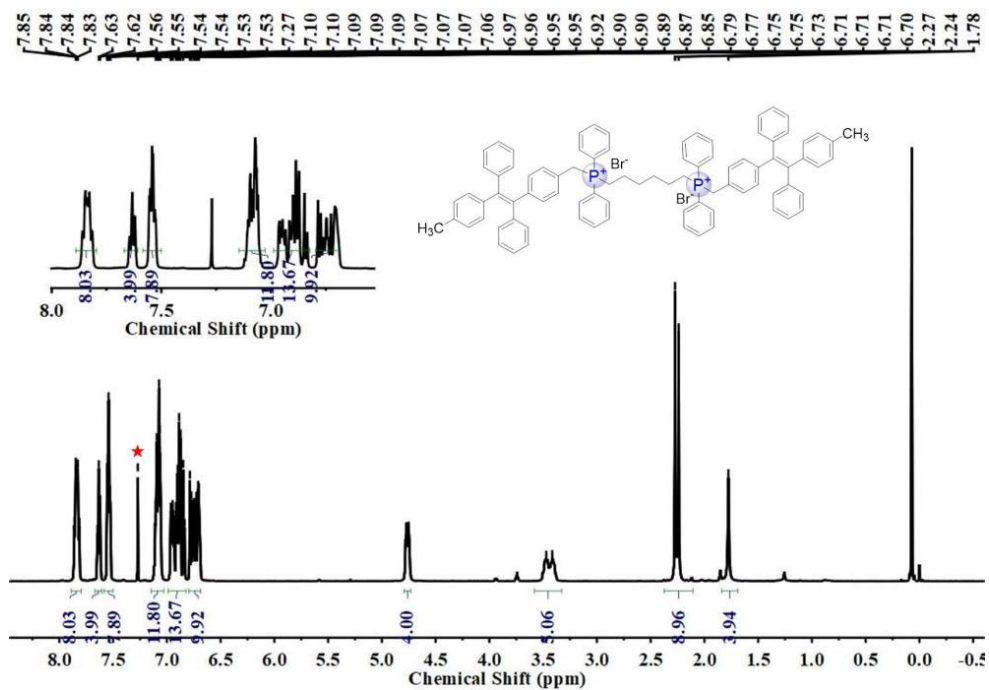

**Figure S9.**  $^1\text{H}$  NMR spectrum of TPE-2P<sup>+</sup> measured in  $\text{CDCl}_3$  at room temperature.

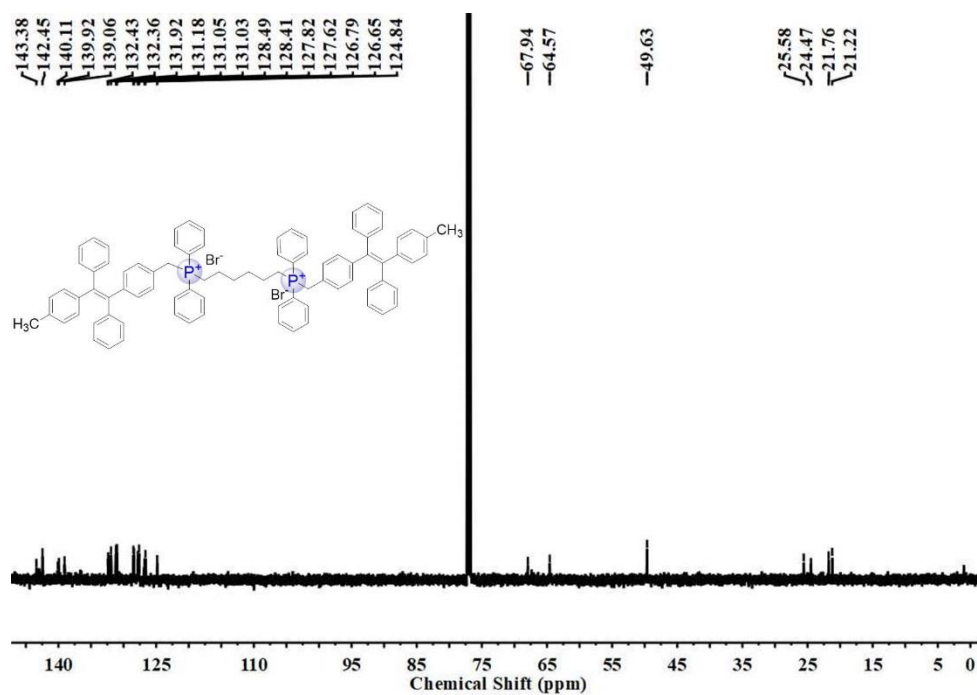

**Figure S10.**  $^{13}\text{C}$  NMR spectrum of TPE-2P<sup>+</sup> measured in  $\text{CDCl}_3$  at room temperature.

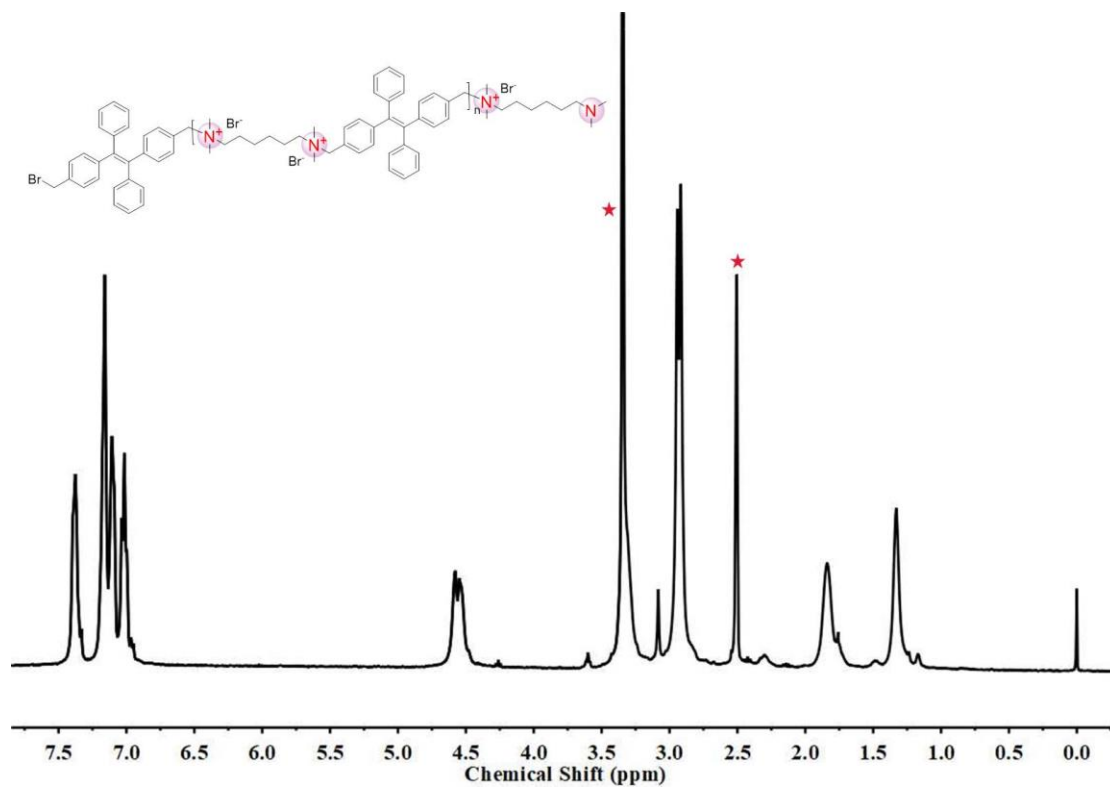

**Figure S11.**  $^1\text{H}$  NMR spectrum of TPE-Ammonium polymer measured in  $\text{DMSO-}d_6$  at room temperature.

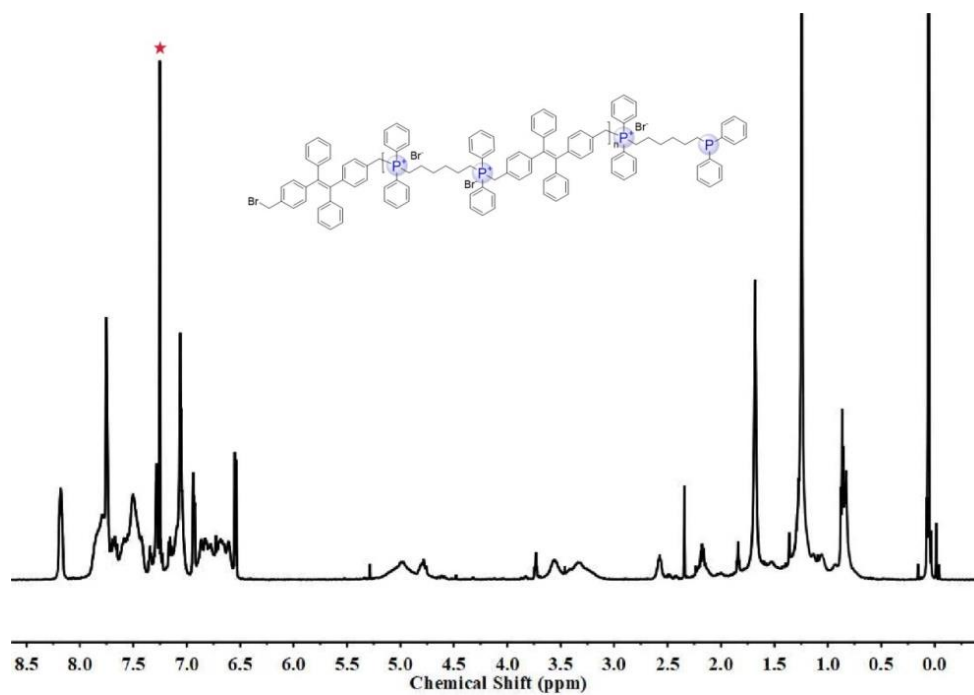

**Figure S12.** <sup>1</sup>H NMR spectrum of TPE-Phosphonium polymer measured in CDCl<sub>3</sub> at room temperature.

## 2. $^{31}\text{P}$ NMR Spectra of Compounds

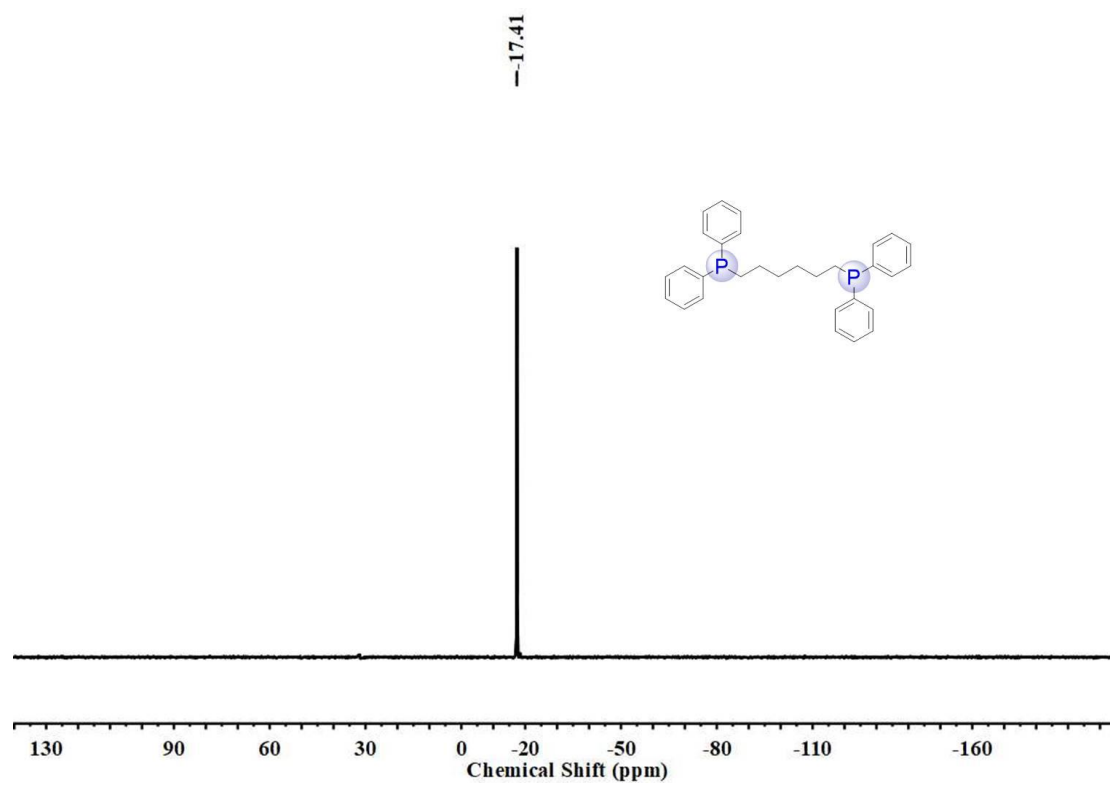

**Figure S13.**  $^{31}\text{P}$  NMR spectrum of DPPH measured in  $\text{CDCl}_3$  at room temperature.

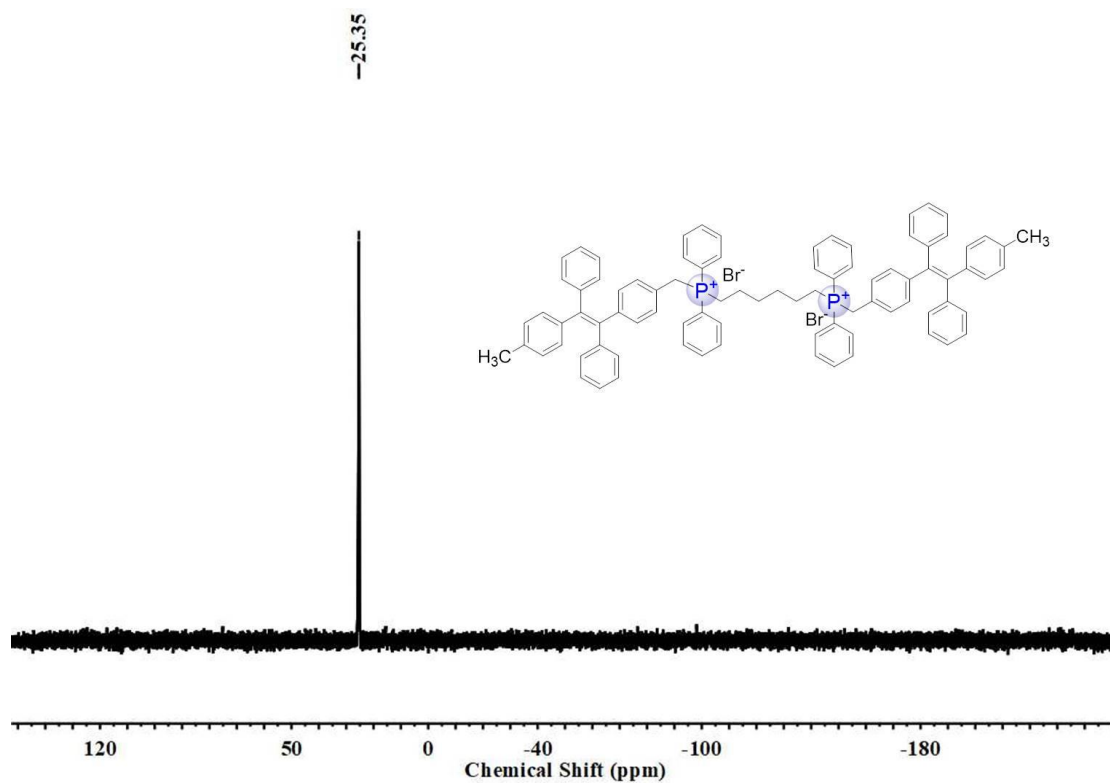

**Figure S14.**  $^{31}\text{P}$  NMR spectrum of TPE-2P<sup>+</sup> measured in  $\text{CDCl}_3$  at room temperature.



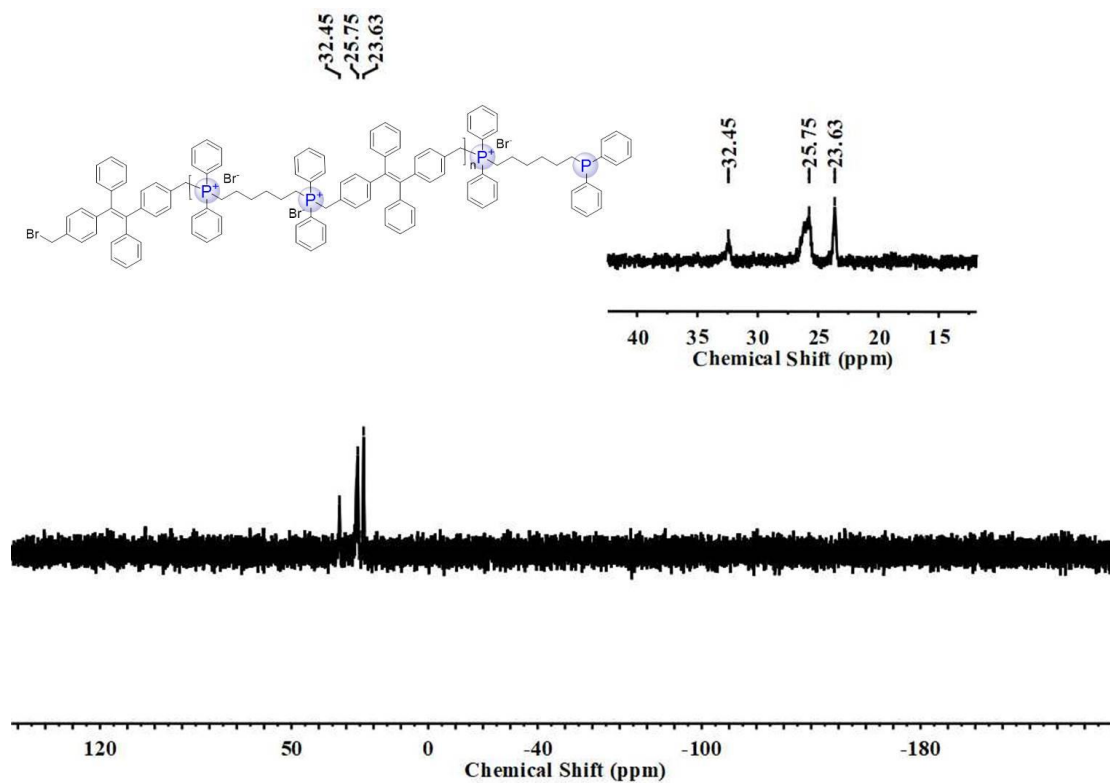

**Figure S15.** <sup>31</sup>P NMR spectrum of TPE-Phosphonium polymer measured in CDCl<sub>3</sub> at room temperature.

### 3. UV-*vis* and PL Spectra of Compounds

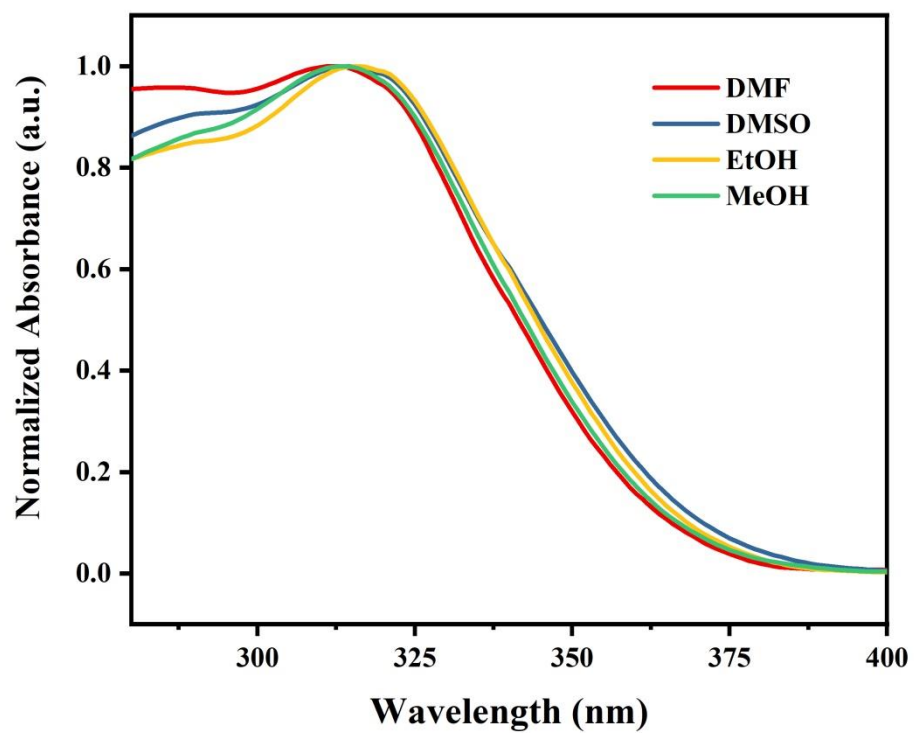

**Figure S16.** Normalized UV-*vis* absorption spectra of TPE-2N<sup>+</sup> in DMF, DMSO, EtOH and MeOH.

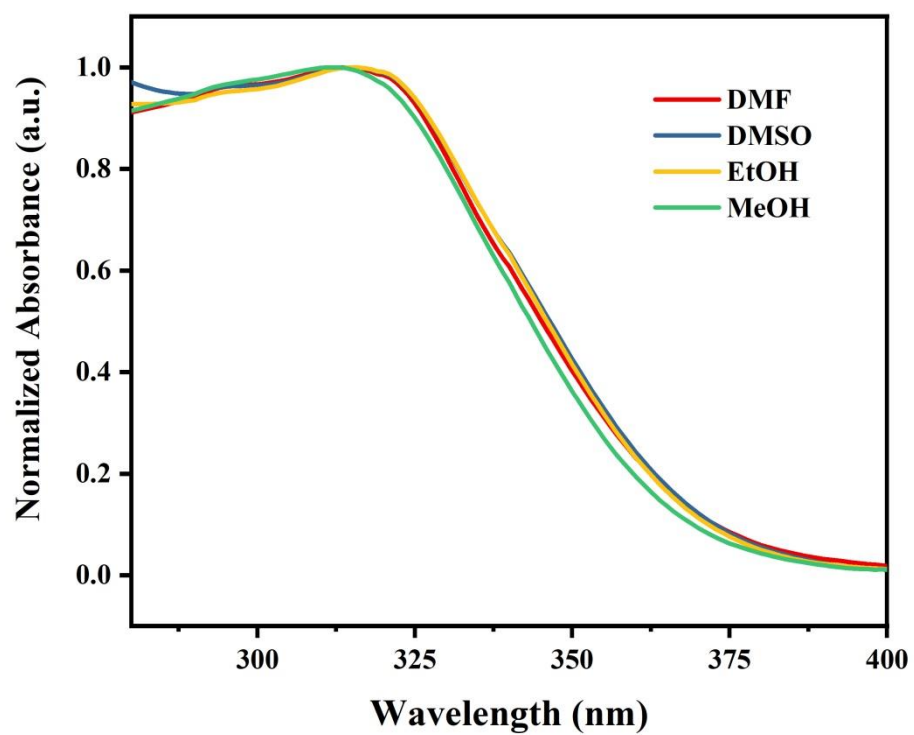

**Figure S17.** Normalized UV-*vis* absorption spectra of TPE-2P<sup>+</sup> in DMF, DMSO, EtOH and MeOH.

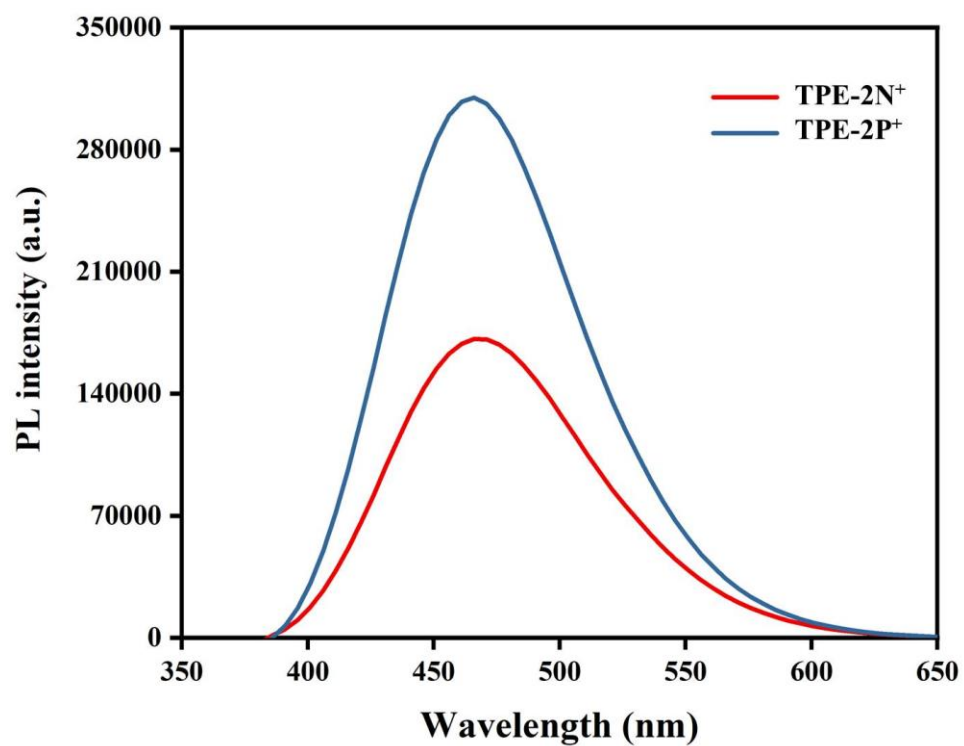

**Figure S18.** Photoluminescence spectra of TPE-2N<sup>+</sup> and TPE-2P<sup>+</sup> in solid state. ( $\lambda_{\text{ex}} = 316$  nm).

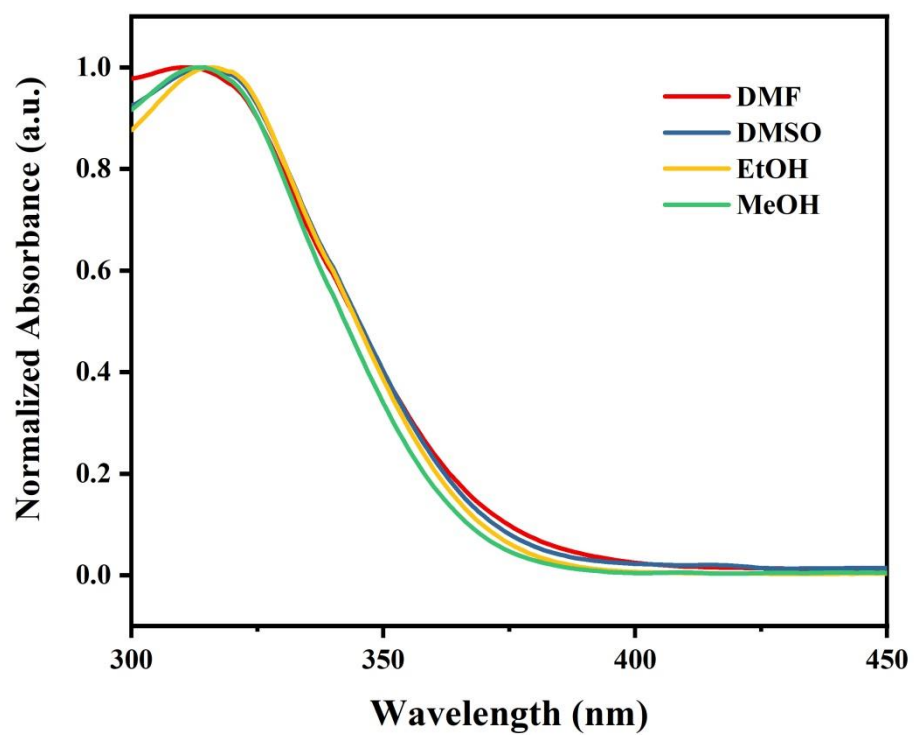

**Figure S19.** Normalized UV-*vis* absorption spectra of TPE-Ammonium polymer in DMF, DMSO, EtOH and MeOH.

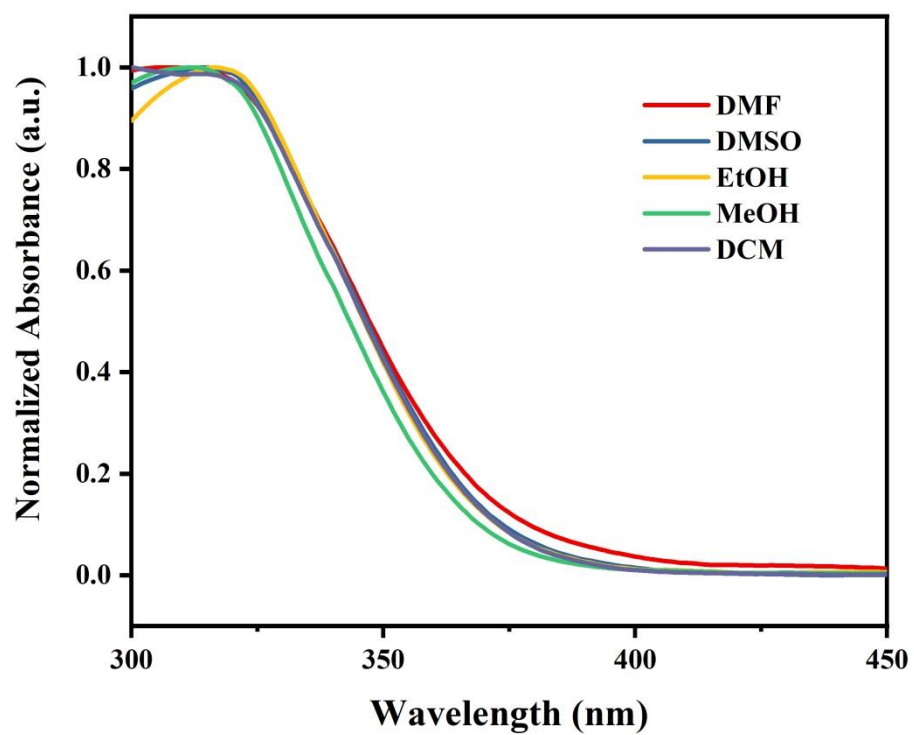

**Figure S20.** Normalized UV-*vis* absorption spectra of TPE-Phosphonium polymer in DMF, DMSO, EtOH, MeOH and DCM.

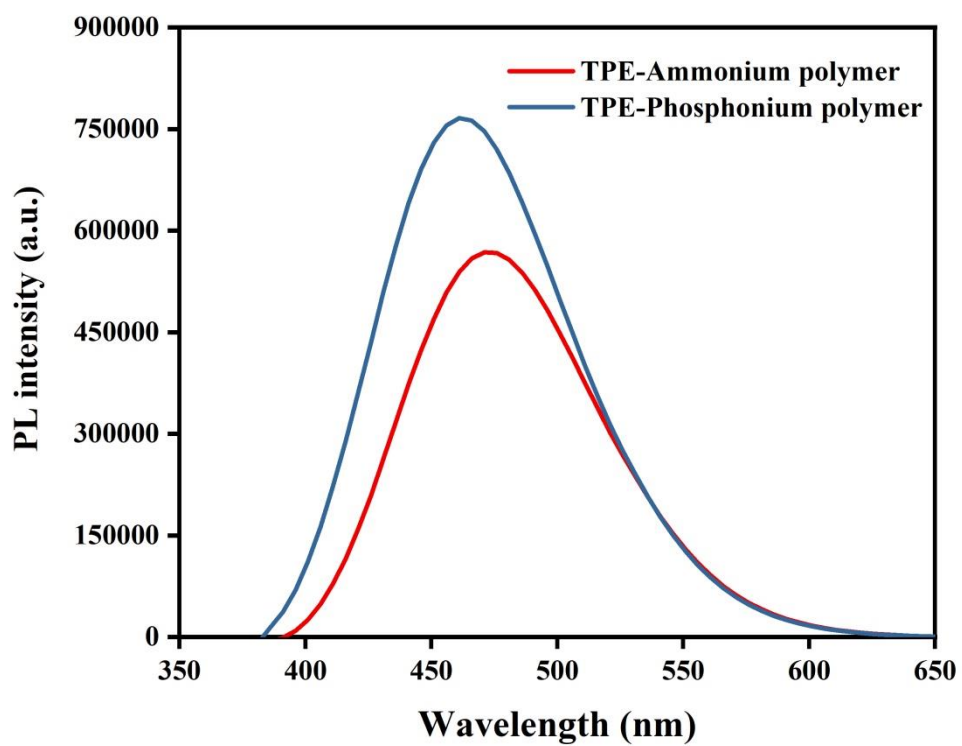

**Figure S21.** Photoluminescence spectra of TPE-Ammonium polymer and TPE-Phosphonium polymer in solid state. ( $\lambda_{\text{ex}} = 316$  nm).

#### 4. FT-IR spectrum of Compounds

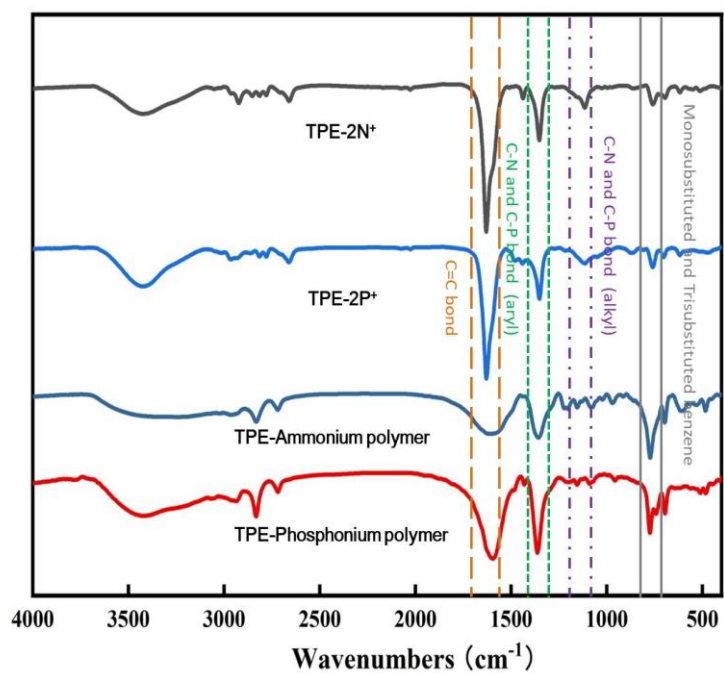

**Figure S22.** FT-IR spectra of TPE-2N<sup>+</sup>, TPE-2P<sup>+</sup> and polymers (KBr tablet).



## 5. AIE test of two polymers

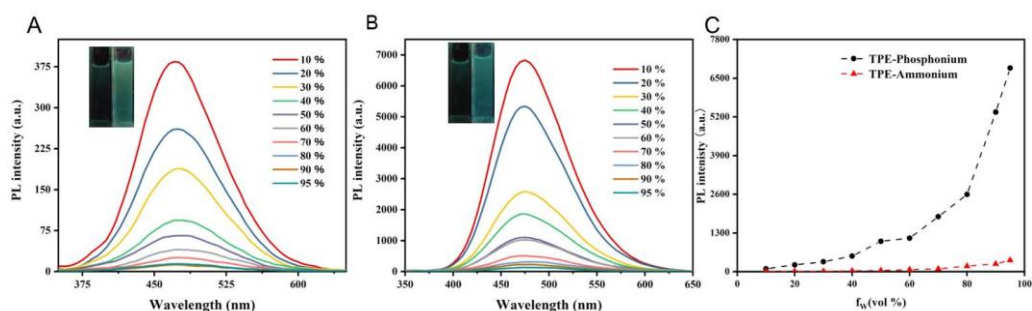

**Figure S23.** Photoluminescence spectra of (A) TPE-Ammonium polymer and (B) TPE-Phosphonium polymer at different ratios of water/ethanol. Inset: photographs of TPE-Ammonium polymer in ethanol and in water/ethanol mixtures when the addition of water was 95%, respectively, taken under illumination at 365 nm; (C) Plots of the maximum emission intensities of TPE-Phosphonium and TPE-Ammonium polymer with  $V_{\text{water}} : V_{\text{EtOH}}$  from 0 to 0.95. (Conc.: 1 mg/mL).

## 6. Wettability test

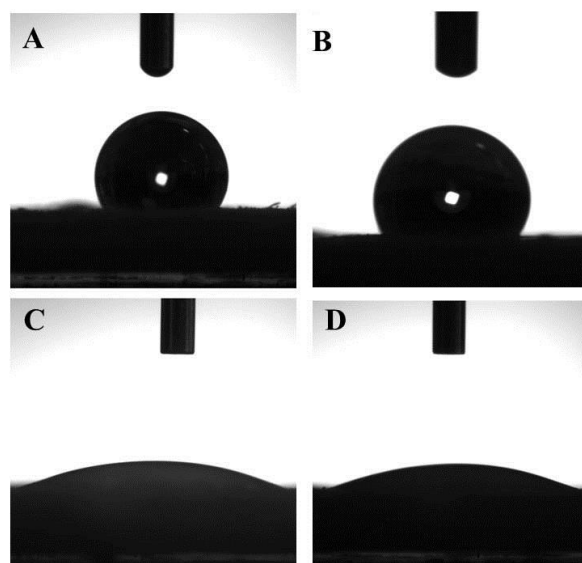

**Figure S24.** Contact angle of (A) TPE-2N<sup>+</sup>, (B) TPE-2P<sup>+</sup>, (C) TPE-Ammonium polymer and (D) TPE-Phosphonium polymer.

## 7. SEM images

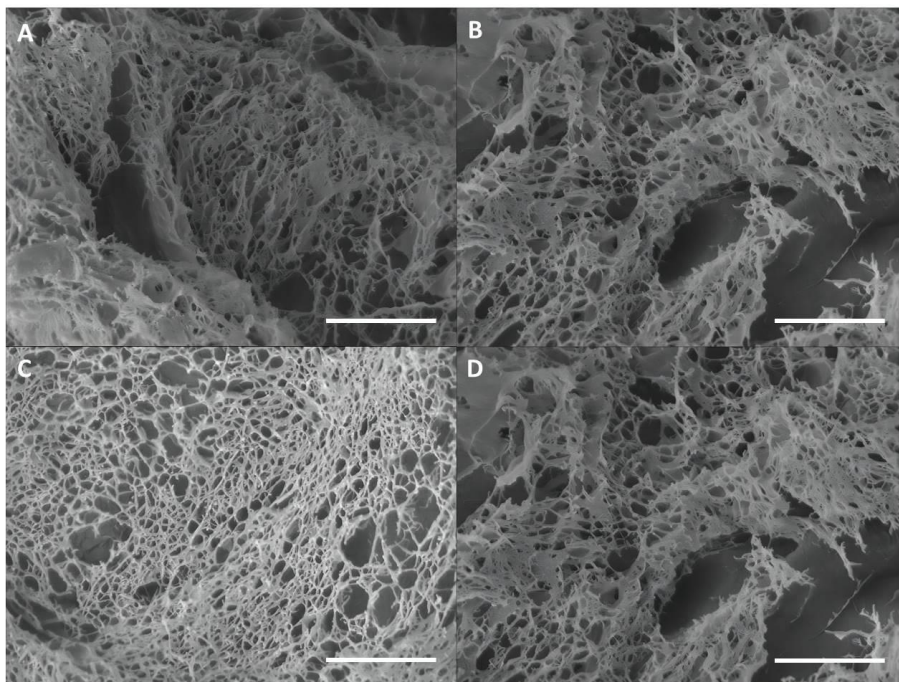

**Figure S25.** SEM images of the xerogel of TPE-Phosphonium polymer with CNCs. Scale bar: 2  $\mu\text{m}$ .

## 8. EDS images

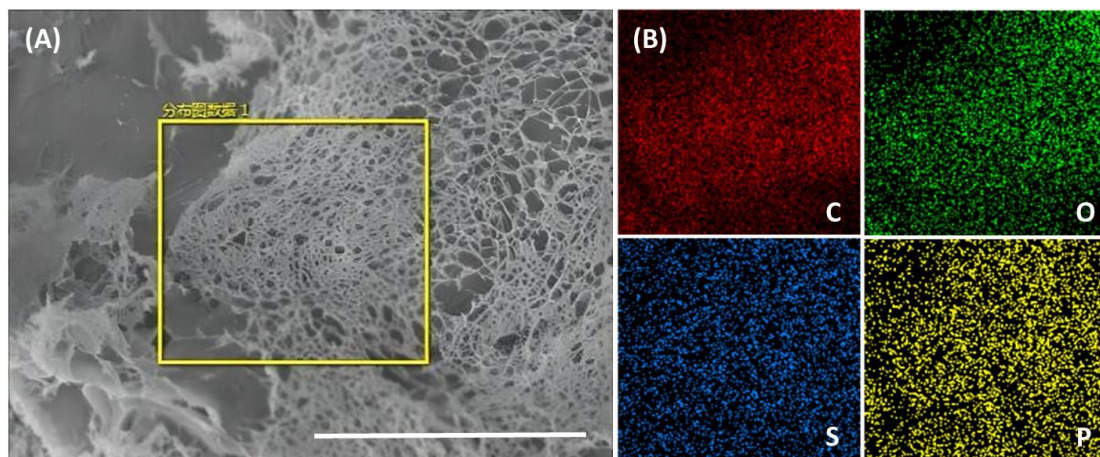

**Figure S26.** SEM images of the scanned area (A). Electron probe micro-analysis of xerogel tested by Energy Dispersive Spectrometer (EDS) (B). Scale bar: 5  $\mu\text{m}$ .

## 9. Antibacterial activity test

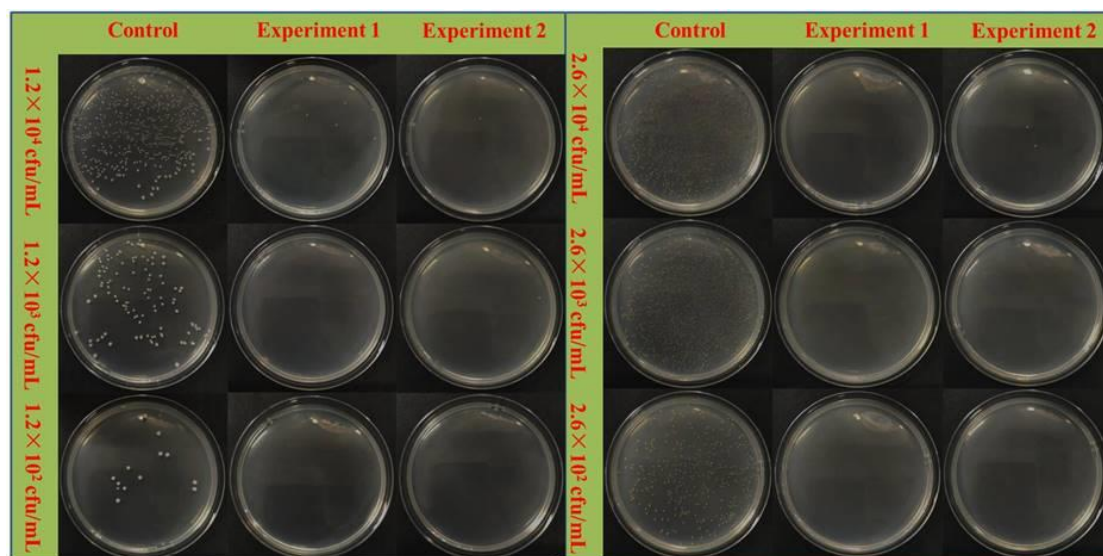

**Figure S27.** Antibacterial activities against *E. coli* (left) and *S. aureus* (right) of TPE-Phosphonium polymer (Conc.: 0.02 mg/mL).

## 10. Bacterial imaging

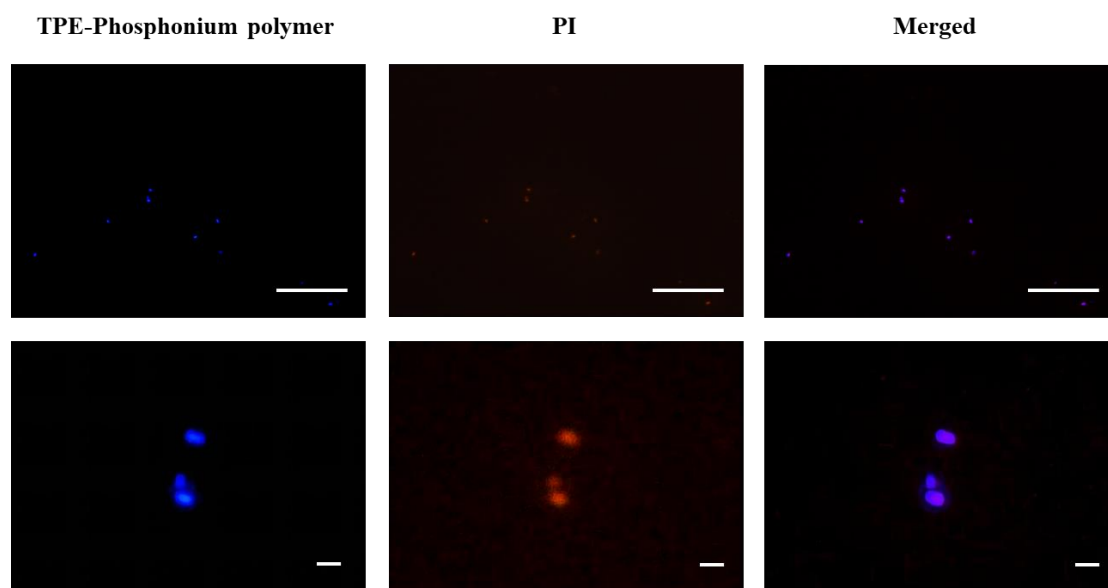

**Figure S28.** Fluorescence images of *E. coli* incubated with  $0.2 \text{ mg/mL}^{-1}$  of TPE-Phosphonium polymer for 12 h, PI for 12h and merged. The bottom images were enlarged. Excitation wavelengths: TPE-Phosphonium polymer for 300 - 400 nm and PI for 440 - 550 nm. (scale bar = 25  $\mu\text{m}$ ).

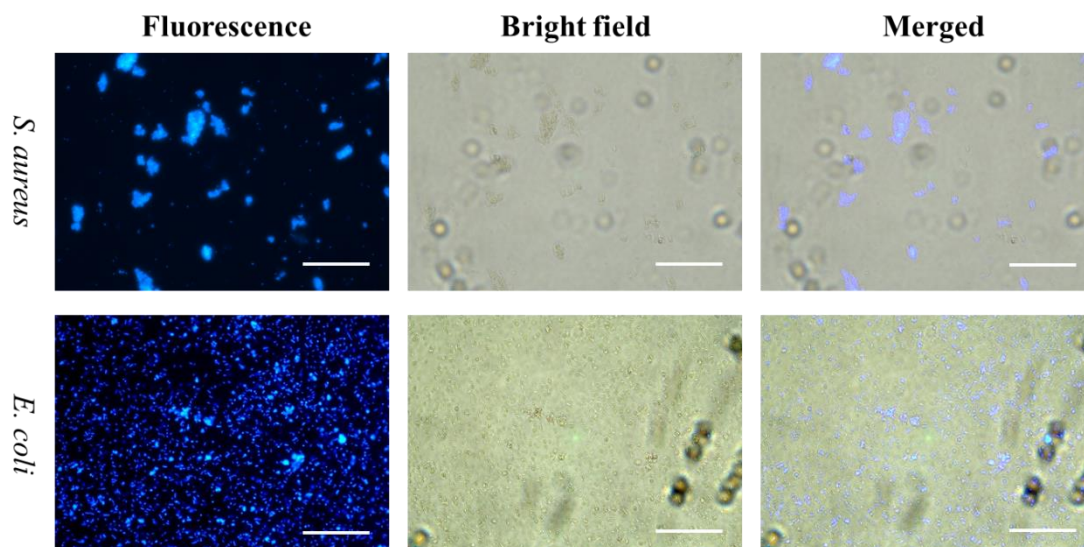

**Figure S29.** Fluorescence microscope images of *S. aureus* and *E. coli* incubated with TPE-Phosphonium polymer ( $0.2 \text{ mg/mL}^{-1}$ ) for 12 h. Excitation wavelengths: 300 - 400 nm. (scale bar = 25  $\mu\text{m}$ ).

## 11. MIC data and the chemical structures of representative antibacterial agents

**Table S1** MIC data from previous works and our work.

| Samples                                                                         | MIC ( $\mu\text{g/mL}$ ) |                |
|---------------------------------------------------------------------------------|--------------------------|----------------|
|                                                                                 | <i>S. aureus</i>         | <i>E. coli</i> |
| [Im][C] <sup>*</sup> ( <i>Polym. Chem-UK. 2018, 9, 4611-4616</i> )              | 460                      | 440            |
| [Qa][Cl] <sup>*</sup> ( <i>Polym. Chem-UK. 2018, 9, 4611-4616</i> )             | 748                      | 654            |
| [DABCO][Cl][Br] <sup>*</sup> ( <i>Polym. Chem-UK. 2018, 9, 4611-4616</i> )      | 2685                     | 2350           |
| S-P[Im][Cl]-L <sup>#</sup> ( <i>Polym. Chem-UK. 2018, 9, 4611-4616</i> )        | 320                      | 265            |
| S-P[Im][Cl] <sup>#</sup> ( <i>Polym. Chem-UK. 2018, 9, 4611-4616</i> )          | 275                      | 235            |
| S-P[Qa][Cl]-L <sup>#</sup> ( <i>Polym. Chem-UK. 2018, 9, 4611-4616</i> )        | 365                      | 285            |
| S-P[Qa][Cl] <sup>#</sup> ( <i>Polym. Chem-UK. 2018, 9, 4611-4616</i> )          | 257                      | 220            |
| S-P[DABCO][Cl][Br]-L <sup>#</sup> ( <i>Polym. Chem-UK. 2018, 9, 4611-4616</i> ) | 887                      | 787            |
| S-P[DABCO][Cl][Br] <sup>#</sup> ( <i>Polym. Chem-UK. 2018, 9, 4611-4616</i> )   | 550                      | 497            |
| Q-PGEDA-OP/TPE <sup>#</sup> ( <i>Chem. Mater. 2018, 30, 1782-1790</i> )         | 15.5                     | 125            |
| Q-PGEDA-OA <sup>#</sup> ( <i>Chem. Mater. 2018, 30, 1782-1790</i> )             | 31.5                     | 500            |
| P4VP-ManTPE <sup>#</sup> ( <i>Biomacromolecules 2021, 22, 2224-2232</i> )       | 15.63                    | 1000           |
| P4VP-BPTPE <sup>#</sup> ( <i>Biomacromolecules 2021, 22, 2224-2232</i> )        | 7.81                     | 500            |
| M-P[Im][Br] <sup>&amp;</sup> ( <i>Polym. Chem-UK. 2018, 9, 4611-4616</i> )      | 52                       | 26             |
| S-P[Qa][Cl] <sup>#</sup> ( <i>Polym. Chem-UK. 2018, 9, 4611-4616</i> )          | 120                      | 58             |
| M-P[Qa][Br] <sup>&amp;</sup> ( <i>Polym. Chem-UK. 2018, 9, 4611-4616</i> )      | 200                      | 180            |
| Diamine polymer 1 <sup>&amp;</sup> ( <i>Biomaterials 2017, 127, 36-48.</i> )    | 3.9                      | 7.8            |
| Diamine polymer 2 <sup>&amp;</sup> ( <i>Biomaterials 2017, 127, 36-48.</i> )    | 7.8                      | 31.3           |
| Diamine polymer 4 <sup>&amp;</sup> ( <i>Biomaterials 2017, 127, 36-48.</i> )    | 3.9                      | 3.9            |
| Diamine polymer 1a <sup>&amp;</sup> ( <i>Biomaterials 2017, 127, 36-48.</i> )   | 1.95                     | 3.9            |
| Diamine polymer 4a <sup>&amp;</sup> ( <i>Biomaterials 2017, 127, 36-48.</i> )   | 1.95                     | 3.9            |
| Diamine polymer 5 <sup>&amp;</sup> ( <i>Biomaterials 2017, 127, 36-48.</i> )    | 3.9                      | 3.9            |
| Diamine polymer 6 <sup>&amp;</sup> ( <i>Biomaterials 2017, 127, 36-48.</i> )    | 3.9                      | 7.8            |
| TPA-Ammonium polymer <sup>&amp;</sup> (Our work)                                | <b>1.95</b>              | <b>3.90</b>    |
| TPE-Phosphonium polymer <sup>&amp;</sup> (Our work)                             | <b>0.24</b>              | <b>0.98</b>    |

\*Small Cationic compound. #Side-chain polymer. &Main-chain polymer.



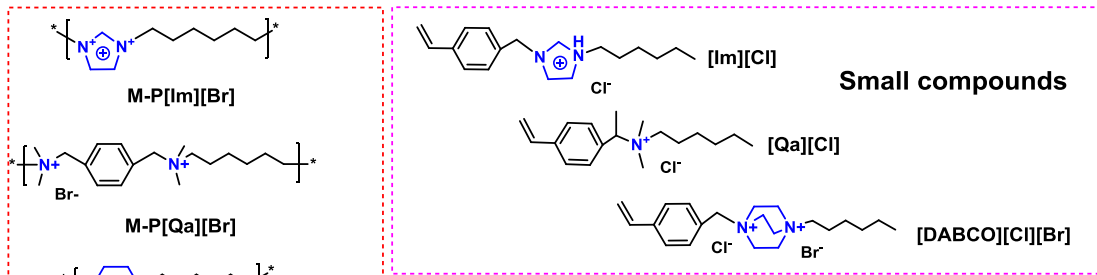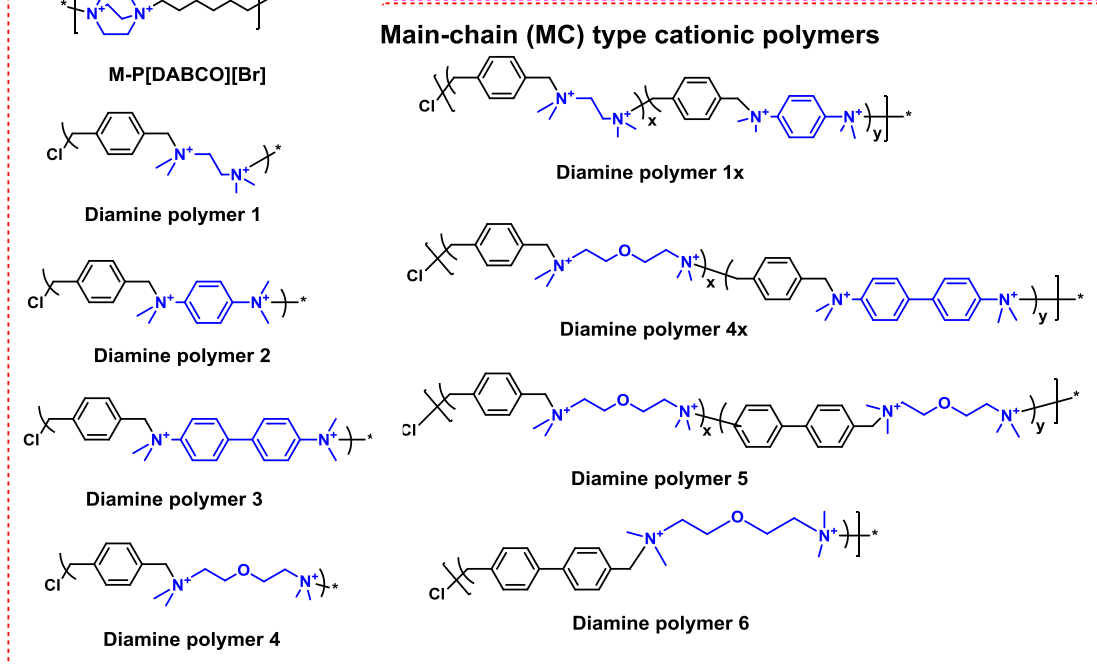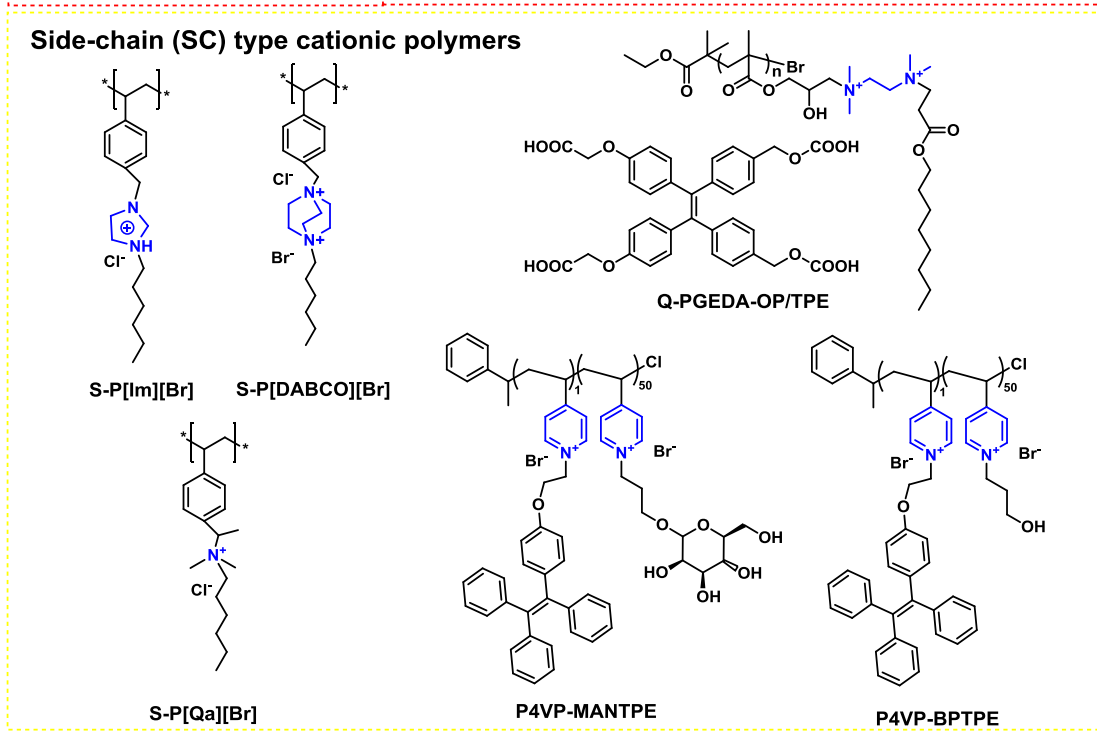

## 12. Density functional theory (DFT) calculations

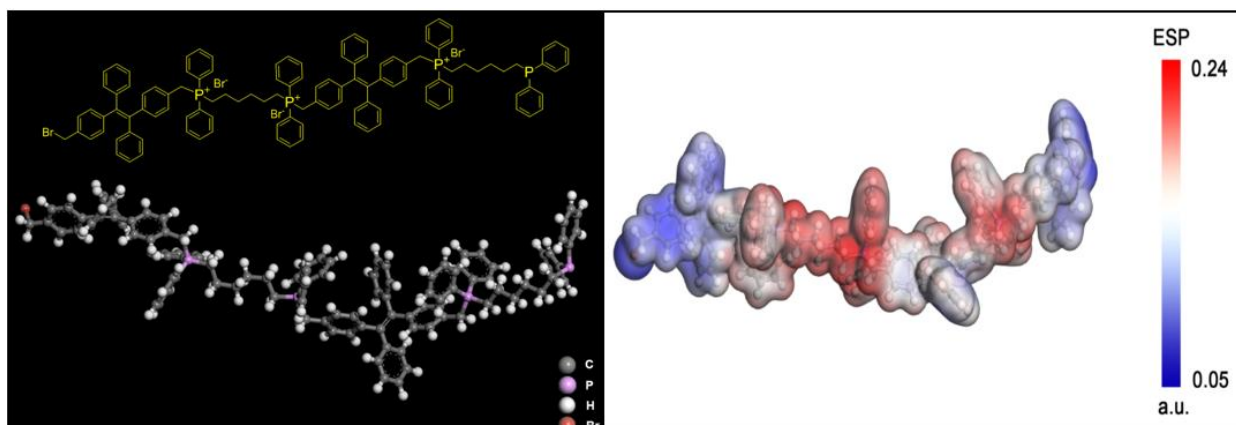

Figure S30. The chemical structure used for density functional theory (DFT) calculations (Upper left), and the optimized configuration (Lower left), The ESP diagram of TPE-Phosphonium polymer's molecular fragment (Right).

### 13. Cytotoxicity

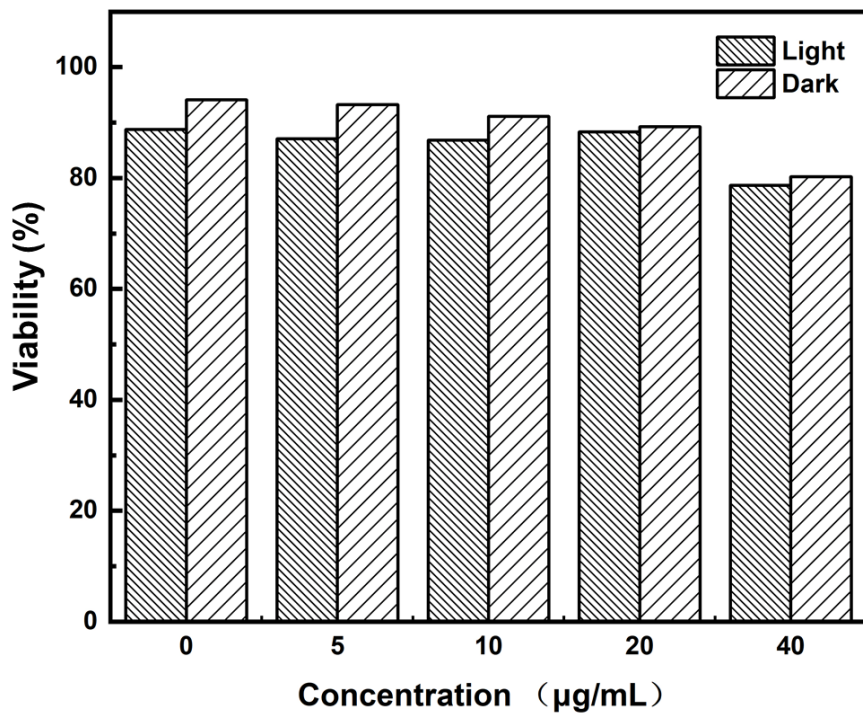

**Figure S31.** HeLa cells were incubated with TPE-Phosphonium polymer for 24h at different concentration: 0, 5, 10, 20 and 40 µg/mL.

## 14. Cell imaging

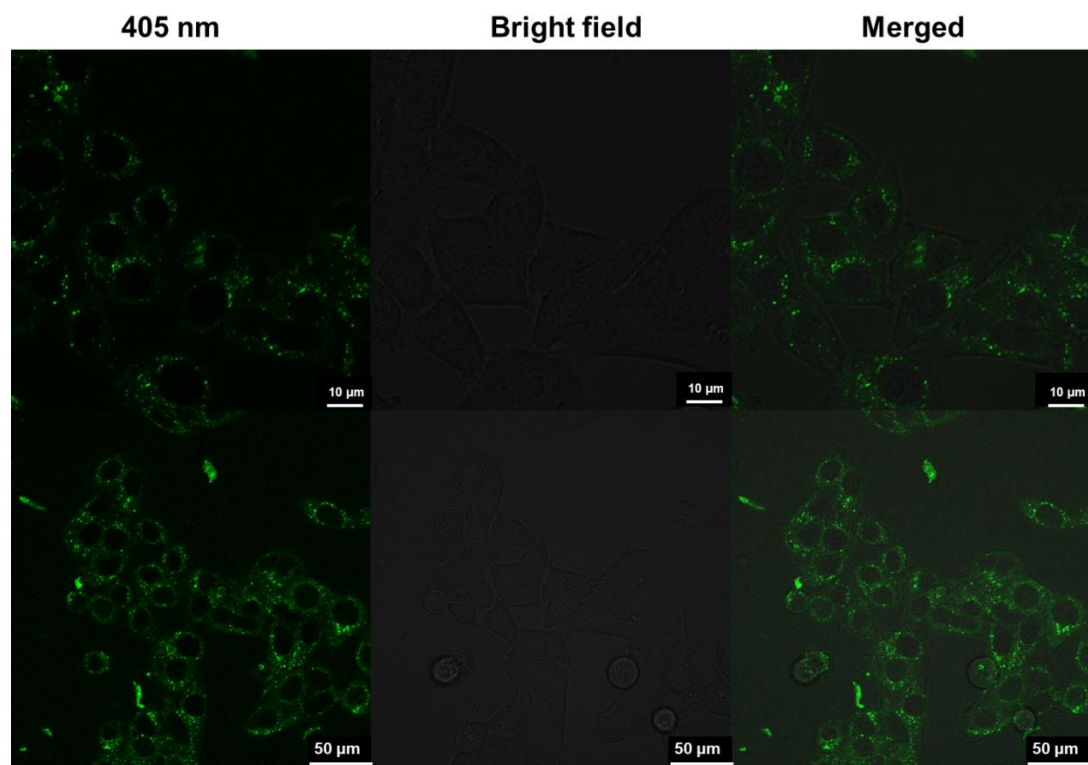

**Figure S32.** Fluorescence images of HeLa cells incubated with 20 μg/mL of TPE-Phosphonium polymer for 12 h (Excitation wavelength: 405 nm), the bright field images and the overlay images.
